# Supplementary material for: Genome-Wide Identification and Expression Profiling of the SRS Gene Family in Melilotus albus Reveals Functions in Various Stress Conditions
Source: MDPI journal article supplement (doi:10.3390/plants11223101), 2022-11-15
Supplement: s1 [file s1]

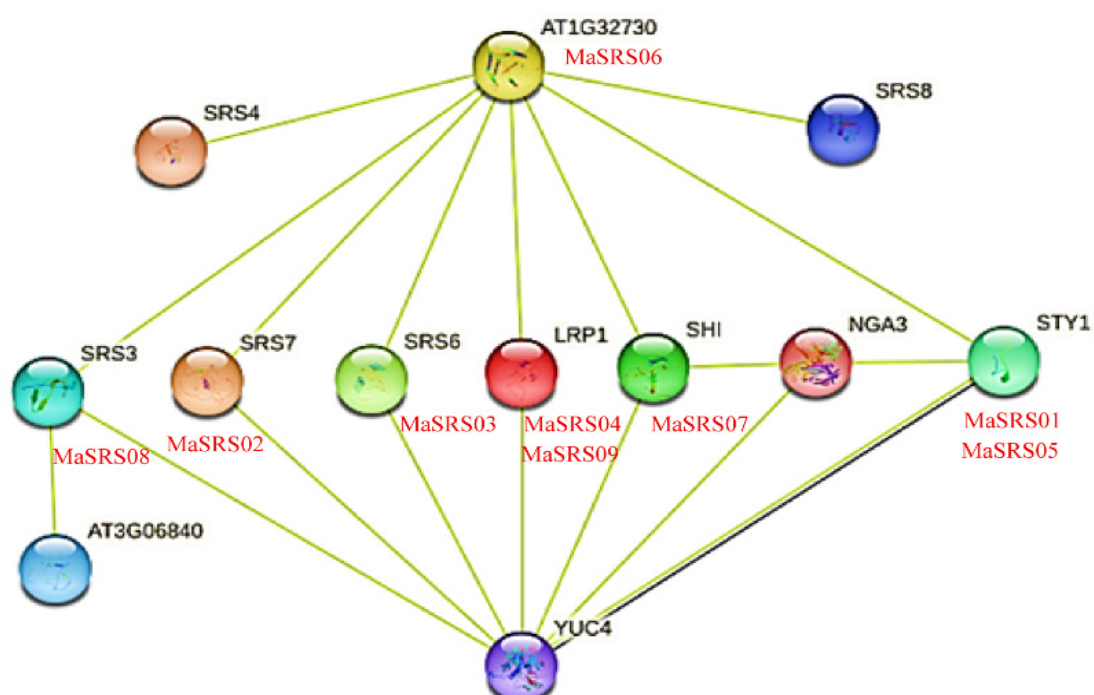

**Supplementary Figure S1.** Construction of a *MaSRS* protein interaction network map based on *Arabidopsis* homologous protein interaction information
