# Supplementary material for: Genome-Wide Identification and Expression Profiling of the SRS Gene Family in Melilotus albus Reveals Functions in Various Stress Conditions
Source: MDPI journal article supplement (doi:10.3390/plants11223101), 2022-11-15
Supplement: s1 [file s1]

**Supplementary Table S2.** Secondary structure prediction of *MaSRS* protein

| Gene ID         | Gene    | Alpha helix (%) | Extended strand (%) | Beta turn (%) | Random coil (%) |
|-----------------|---------|-----------------|---------------------|---------------|-----------------|
| Malbus0105973.1 | MaSRS01 | 14.75           | 14.16               | 2.65          | 68.44           |
| Malbus0200518.1 | MaSRS02 | 13.19           | 13.92               | 2.93          | 69.69           |
| Malbus0205193.1 | MaSRS03 | 7.23            | 16.87               | 3.31          | 72.59           |
| Malbus0501767.1 | MaSRS04 | 9.26            | 17.59               | 4.32          | 68.83           |
| Malbus0503375.1 | MaSRS05 | 13.86           | 12.68               | 2.95          | 70.50           |
| Malbus0503792.1 | MaSRS06 | 44.29           | 1.90                | 0.54          | 53.26           |
| Malbus0601083.1 | MaSRS07 | 12.69           | 14.24               | 2.79          | 70.28           |
| Malbus0702600.1 | MaSRS08 | 17.26           | 16.75               | 2.54          | 63.45           |
| Malbus0800677.1 | MaSRS09 | 9.07            | 18.98               | 6.80          | 65.16           |
| Mean value      |         | 15.73           | 14.12               | 3.20          | 66.91           |
